# Supplementary material for: Sr1−xKxSi1−yGeyO3−0.5x: a new family of superior oxide-ion conductors
Source: Royal Society of Chemistry journal article supplement (doi:10.1039/c2ee22978a), 2012-01-01
Supplement: c2ee22978a.pdf [file c2ee22978a.pdf]

Supporting Figures:

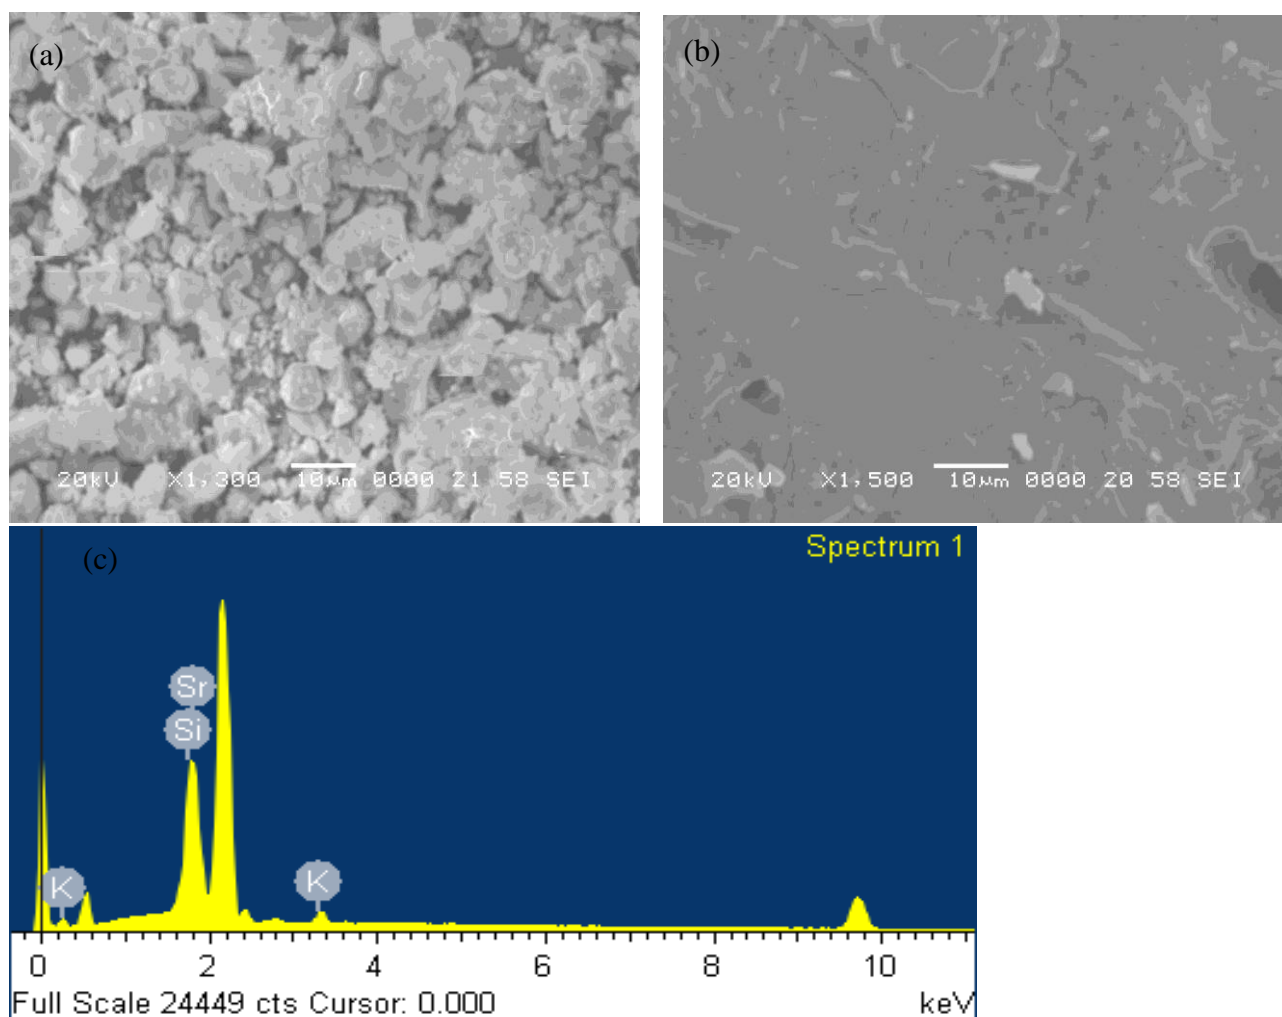

Figure S1. SEM image of  $\text{Sr}_{0.8}\text{K}_{0.2}\text{SiO}_{2.9}$  (a) powder, (b) pellet and (c) EDX image of the pellet.

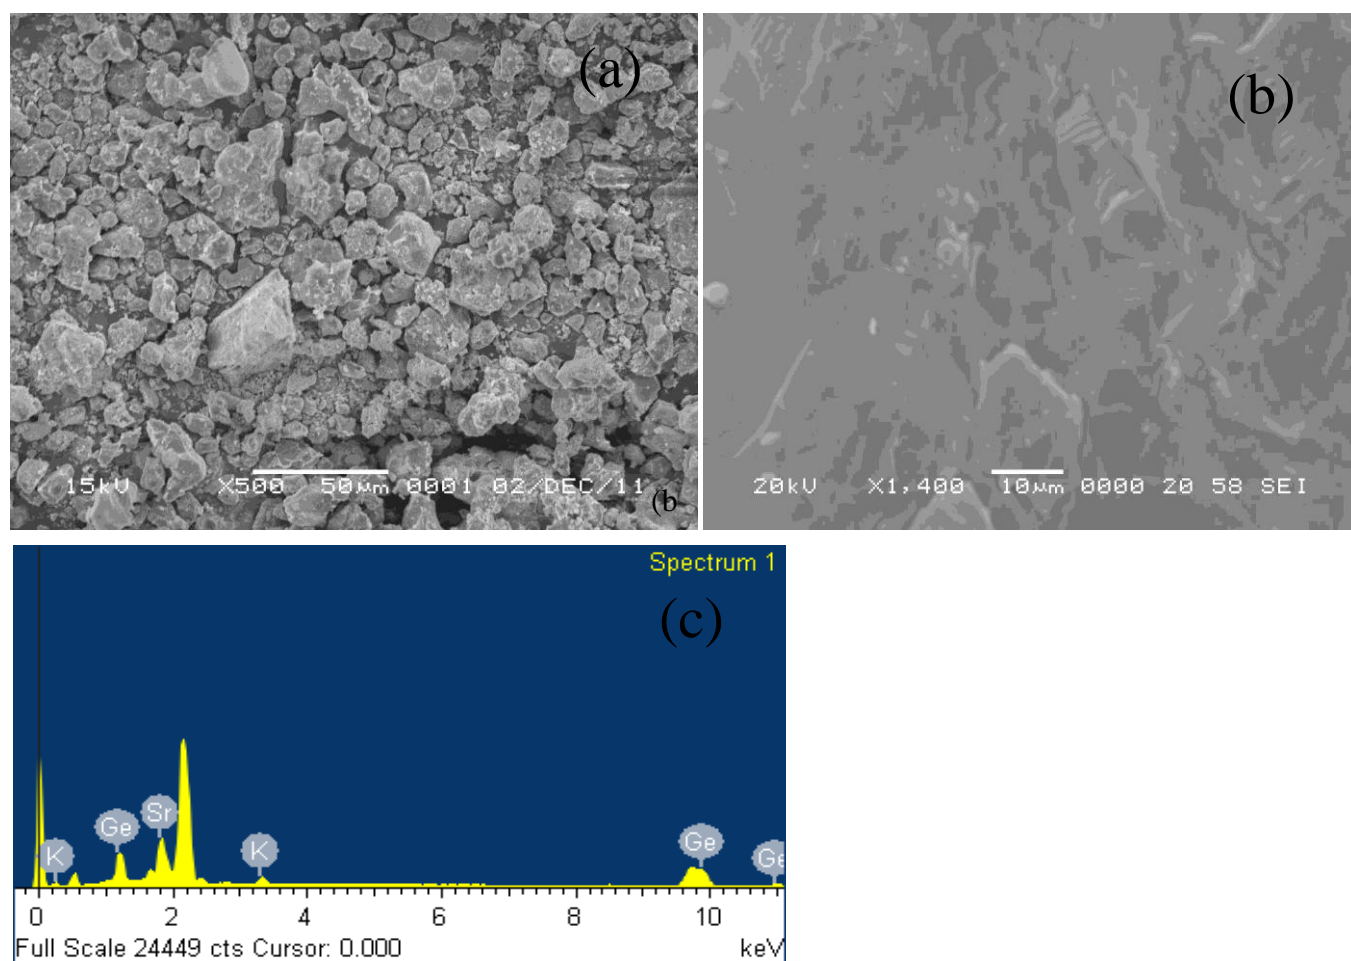

Figure S2. SEM image of  $\text{Sr}_{0.85}\text{K}_{0.15}\text{GeO}_{2.925}$  (a) powder, (b) pellet and (c) EDX image of the pellet.
